# Supplementary material for: Single-cell architecture and functional requirement of alternative splicing during hematopoietic stem cell formation
Source: PubMed Central journal article supplement — Sci Adv. 2022 Jan 7;8(1):eabg5369. doi: 10.1126/sciadv.abg5369 (PMC8741192; doi:10.1126/sciadv.abg5369), 2022-01-07
Supplement: sciadv.abg5369_sm.pdf [file sciadv.abg5369_sm.pdf]

Supplementary Materials for  
**Single-cell architecture and functional requirement of alternative splicing  
during hematopoietic stem cell formation**

Fang Wang, Puwen Tan, Pengcheng Zhang, Yue Ren, Jie Zhou, Yunqiao Li, Siyuan Hou,  
Shuaili Li, Linlin Zhang, Yanni Ma, Chaojie Wang, Wanbo Tang, Xiaoshuang Wang, Yue Huo,  
Yongfei Hu, Tianyu Cui, Chao Niu, Dong Wang\*, Bing Liu\*, Yu Lan\*, Jia Yu\*

\*Corresponding author. Email: wangdong79@smu.edu.cn (D.W.); bingliu17@yahoo.com (B.L.);  
rainyblue\_1999@126.com (Y.Lan); j-yu@ibms.pumc.edu.cn (J.Y.)

Published 7 January 2022, *Sci. Adv.* **8**, eabg5369 (2022)  
DOI: 10.1126/sciadv.abg5369

**The PDF file includes:**

Figs. S1 to S6  
Legends for tables S1 to S6

**Other Supplementary Material for this manuscript includes the following:**

Tables S1 to S6

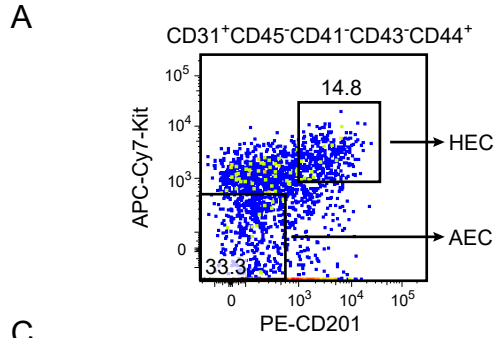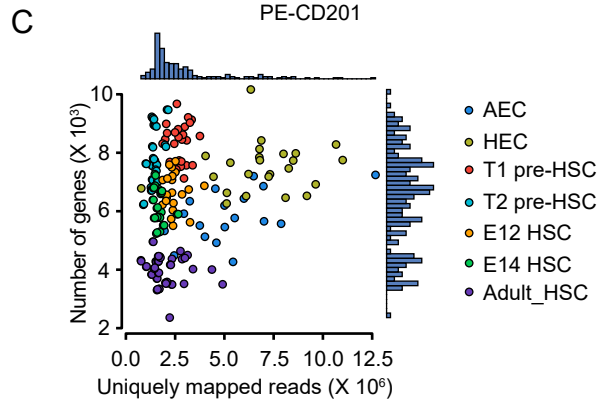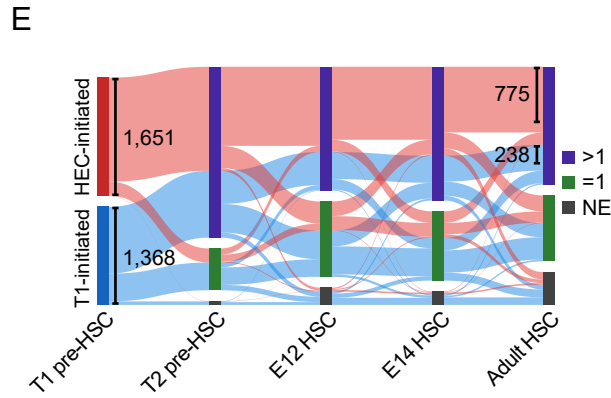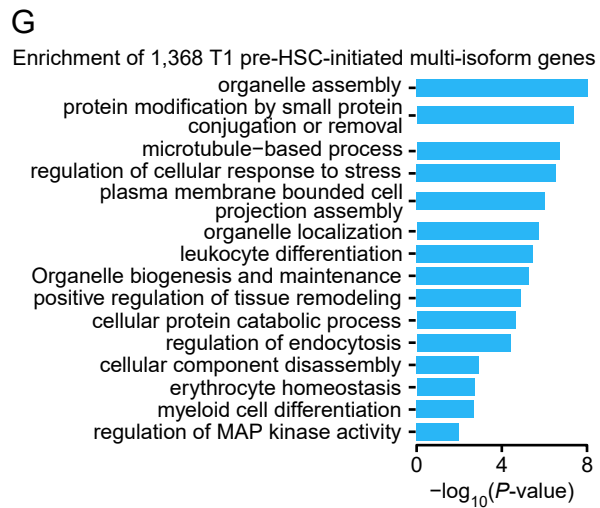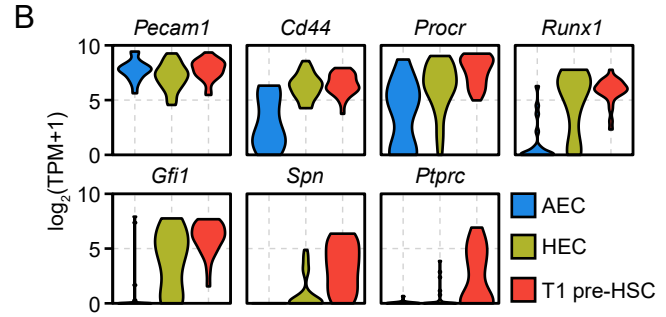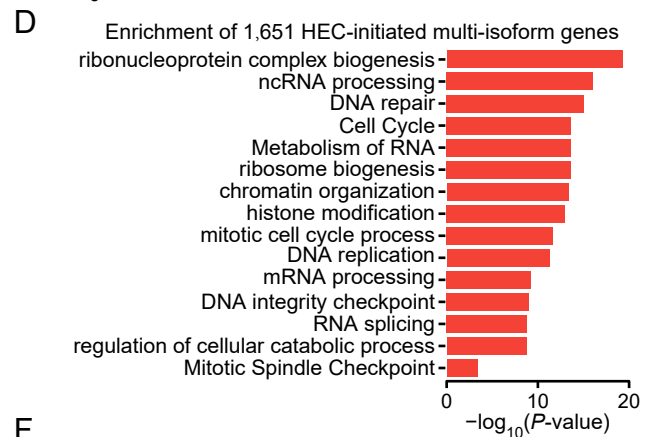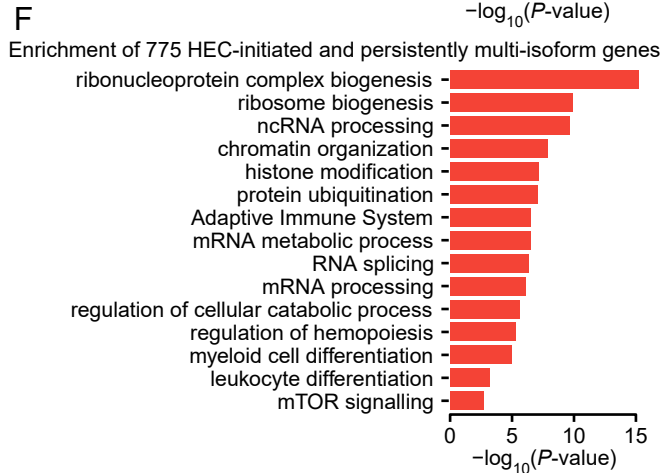

**Fig. S1. Transcript Diversity during Mouse HSC Development.**

**(A)** Representative flow cytometry analysis for cell sorting of AECs (CD31+CD45-CD41-CD43-CD201-Kit-CD44+) and HECs (CD31+CD45-CD41-CD43-CD201+Kit+CD44+) from E10 AGM region. **(B)** Violin plot showing the expression levels of indicated genes in AEC, HEC and T1 pre-HSC stages. **(C)** Density diagram showing the uniquely mapped reads and the expressed gene number in each single-cell. **(D)** Bar plot showing the enriched terms of HEC-initiated multi-isoform genes. **(E)** Sankey diagram showing the dynamic changes of HEC-initiated multi-isoform genes (HEC-initiated) and T1 pre-HSC-initiated multi-isoform genes (T1-initiated) from T1 pre-HSCs to Adult HSCs. The numbers on the graph indicate the number of expressed genes. >1, multi-isoform gene; =1, single-isoform gene; NE, No expression. **(F)** Bar plot showing the enriched terms of HEC-initiated and persistently multi-isoform genes. **(G)** Bar plot showing the enriched terms of T1 pre-HSC-initiated multi-isoform genes.

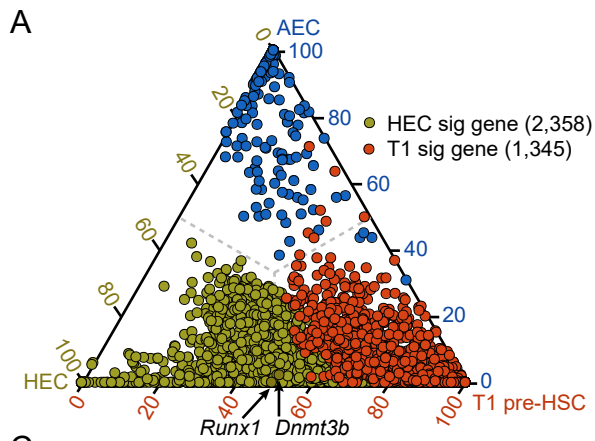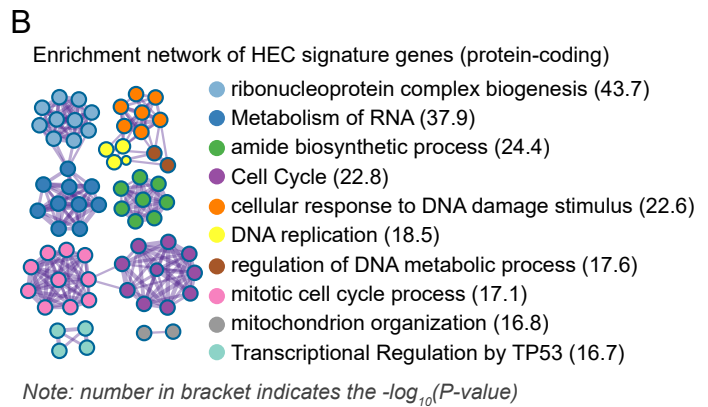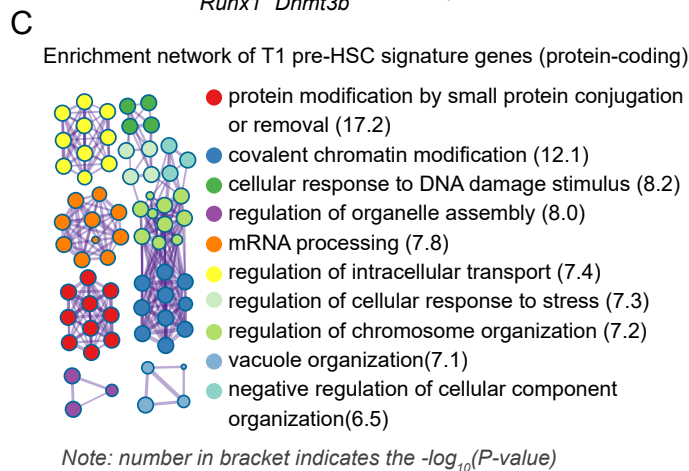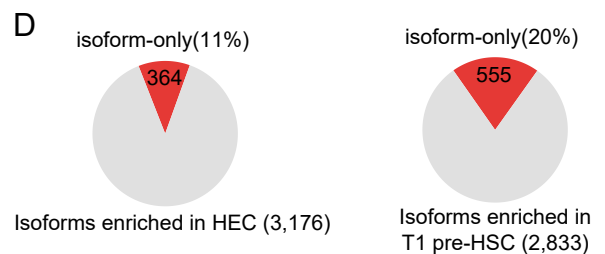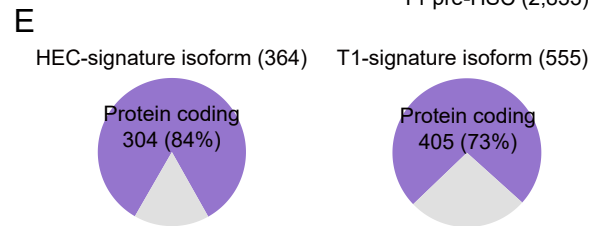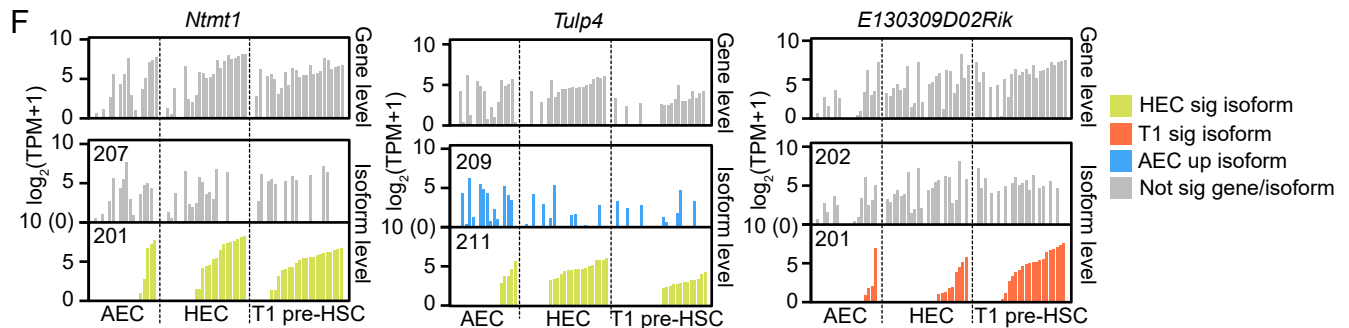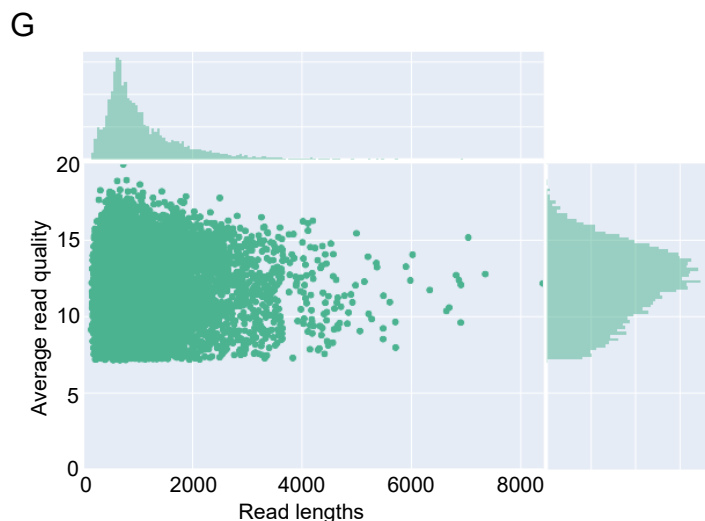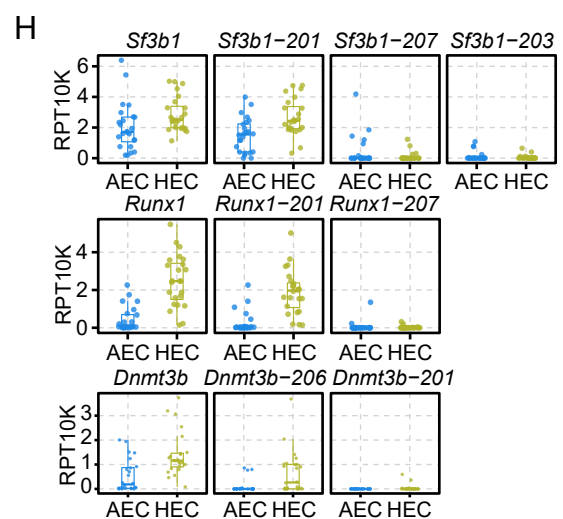

**Fig. S2. HEC and T1 pre-HSC Signature Genes and Isoforms.**

(A) Ternary phase diagram showing the relative enrichment of HEC (HEC sig) and T1 pre-HSC (T1 sig) signature genes. Upregulated genes in AEC compared to HEC were plot in blue. Indicated genes in Fig. 2F were labeled. (B-C) Enrichment network representing the top 10 enriched terms of HEC (B) and T1 pre-HSC (C) signature genes with protein coding abilities. Enriched terms with highly similarity were clustered and rendered as a network, while each node represents an enriched term and is colored by its cluster. Node size indicates the number of enriched genes and the line thickness indicates the similarity score shared by two enriched terms. The term with smallest *P*-value from each cluster was labeled. (D) Proportion of HEC (left) and T1 pre-HSC (right) signature isoforms in all enriched isoforms in HEC or T1 pre-HSC. (E) Proportion of HEC (left) and T1 pre-HSC (right) signature isoforms with protein coding abilities. (F) Bar plot showing the expression levels of indicated HEC and T1 pre-HSC signature isoforms in Fig. 2A. Number on the upper left represents the isoform ID from Ensembl. (G) Density diagram showing the distribution of average read quality and read lengths from Nanopore-seq data. (H) Boxplot showing the expression level of *Sf3b1*, *Runx1* and *Dnmt3b* genes, as well as isoforms in AEC and HEC quantified using Nanopore-seq data.

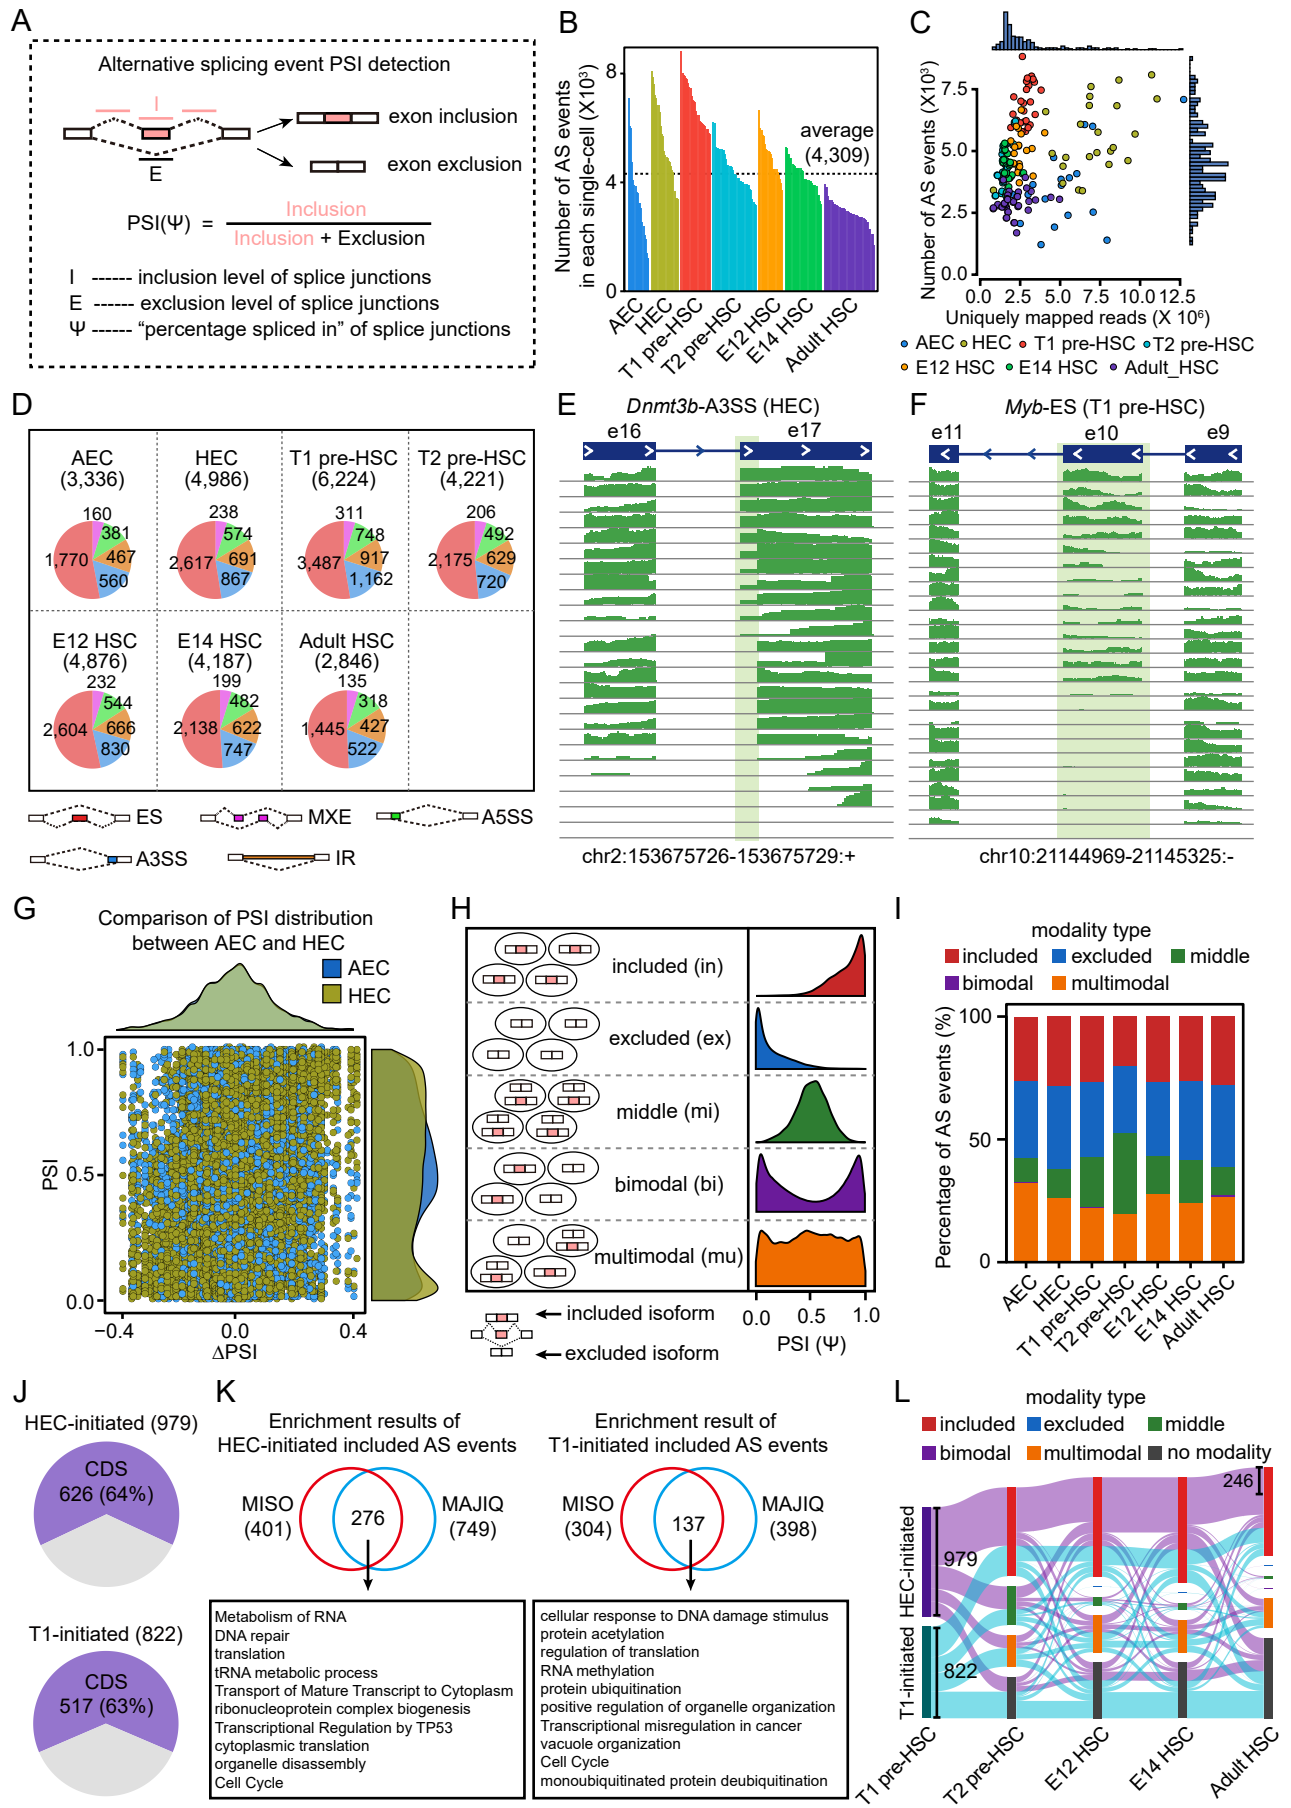

**Fig. S3. Splicing Profiles during Endothelial-to-Hematopoietic Transition.**

(A) Schematic illustration of the simplified calculation of PSI of AS events. (B) Number of AS events detected with PSI in an individual cell of each cell population. (C) Density diagram showing the uniquely mapped reads and the AS event number in each single-cell. (D) Proportion of five types of AS events at each development stage. Schematic illustration of AS events types was plotted at bottom. The number on the graph represent the average number of AS events for each type of AS event, while the number in the brackets indicate the total number of AS events in each stage. ES, exon skipping; MXE, mutually exclusive exons; A5SS, alternative 5' splice sites; A3SS, alternative 3' splice sites; IR, intron retention. (E) Coverage track of alternative spliced exon 17 from *Dnmt3b* in HEC. Each row represents a single cell. The AS event type followed with gene name at top. The genomic location of alternative spliced exon labeled at the bottom. (F) Coverage track of alternative spliced exon 10 from *Myb* in T1 pre-HSC. Each row represents a single cell. The AS event type followed with gene name at top. The genomic location of alternative spliced exon labeled at the bottom. (G) Density diagram showing the PSI distribution between AEC and HEC using two different methods. X-axis represents the average difference ( $\delta$ PSI) of an AS events between AEC and HEC, while y-axis represents the PSI in each single cell from AEC and HEC stages. (H) Schematic illustration of five AS modality types. Each oval on the left represents a cell in a specific cell population. Distributions plot on the right represent the typical PSI distribution in five modalities. (I) Bar plot showing the proportion of AS event with different modalities in each cell population. (J) Proportion of HEC-initiated (top) and T1 pre-HSC-initiated (bottom) included AS events located in CDS regions. (K) Venn diagram showing the overlap between MISO and MAJIQ algorithms concerning the enriched terms of HEC- (left) or T1-initiated (right) included AS events. (L) Sankey diagram showing modality changes of HEC- (HEC-initiated) and T1 pre-HSC- (T1-initiated) initiated included AS events from T1 pre-HSCs to Adult HSCs. The numbers on the graph indicate the number of AS events.

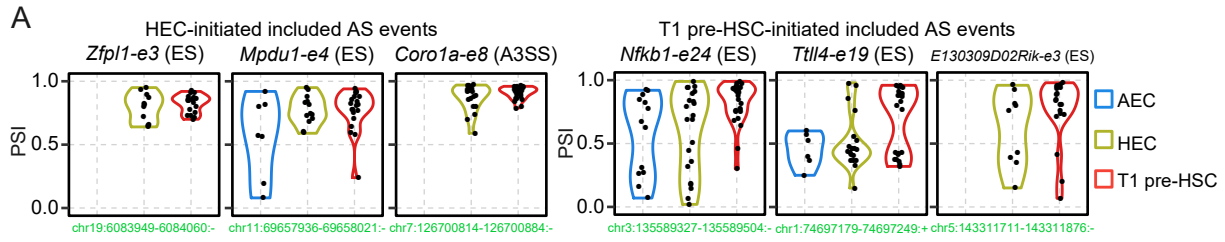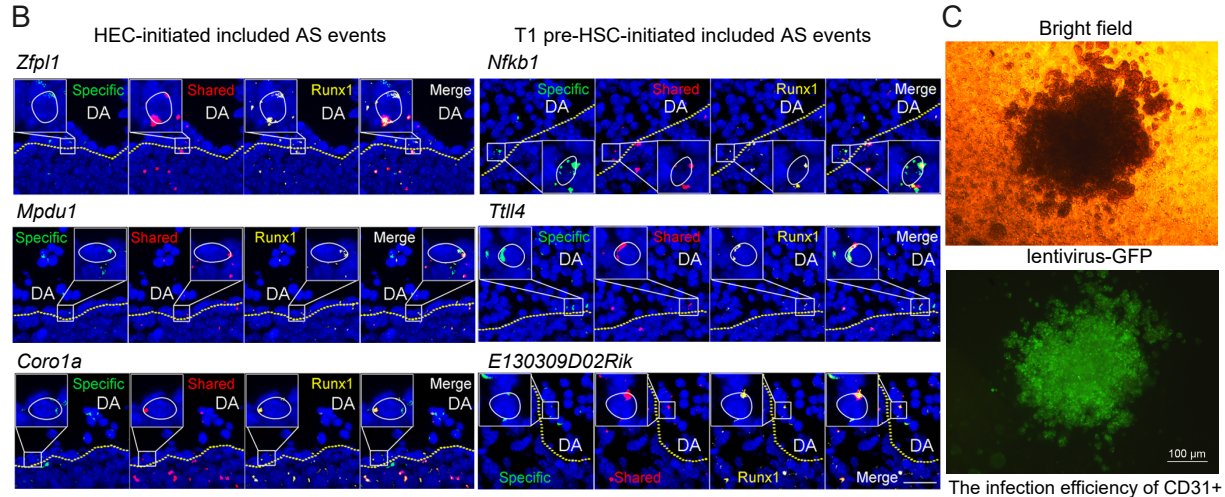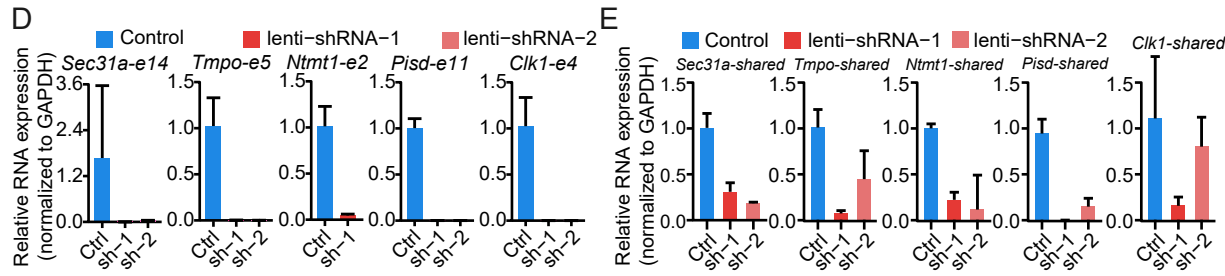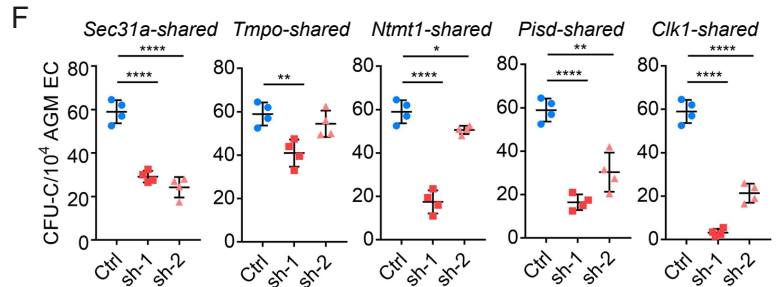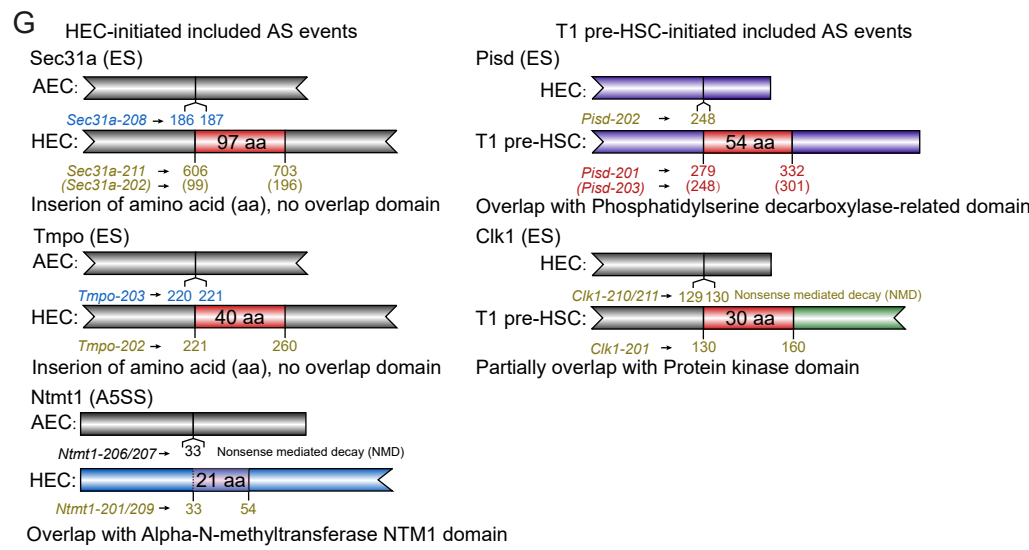



**Fig. S4. Expression and *In Vitro* Function Validation of HEC- and T1 pre-HSC-Initiated Included AS Events.**

(A) Violin plot representing the PSI changes of indicated HEC- (left) or T1 pre-HSC- (right) initiated included AS events. The genomic location of alternative spliced exons was labeled in green at bottom. Number of alternative spliced exon was labeled after gene name, followed with AS event type in brackets. ES, exon skipping; A3SS, alternative 3' splice sites. (B) Simultaneous detection of RNA and protein by using probes against the specific and shared exons, as well as antibody against Runx1 at E11 AGM region. DA, dorsal aorta. Scale bar, 25 $\mu$ m. (C) The infection efficiency of CD31<sup>+</sup> cells by purified lentivirus. (D) Q-PCR detection of each alternative spliced exon in CD31<sup>+</sup> cells infected with indicated lentivirus. (Data are represented as mean  $\pm$  SEM.) (E) Q-PCR detection of shared exons of each gene in CD31<sup>+</sup> cells infected with indicated lentivirus. (Data are represented as mean  $\pm$  SEM.) (F) Relative CFU-C number of lentivirus-mediated knockdown of shared exons of indicated genes in AGM CD31<sup>+</sup> cells. (Data are represented as mean  $\pm$  SEM. Two-sided Wilcoxon rank-sum test, \* $P$ <0.05, \*\* $P$ <0.01, \*\*\* $P$ <0.001, \*\*\*\* $P$ <0.0001). (G) Schematic illustration showing the protein structure alterations of indicated AS events. Numbers under each bar representing the location of amino acid sequence. ES, exon skipping. A5SS, alternative 5' splicing site.

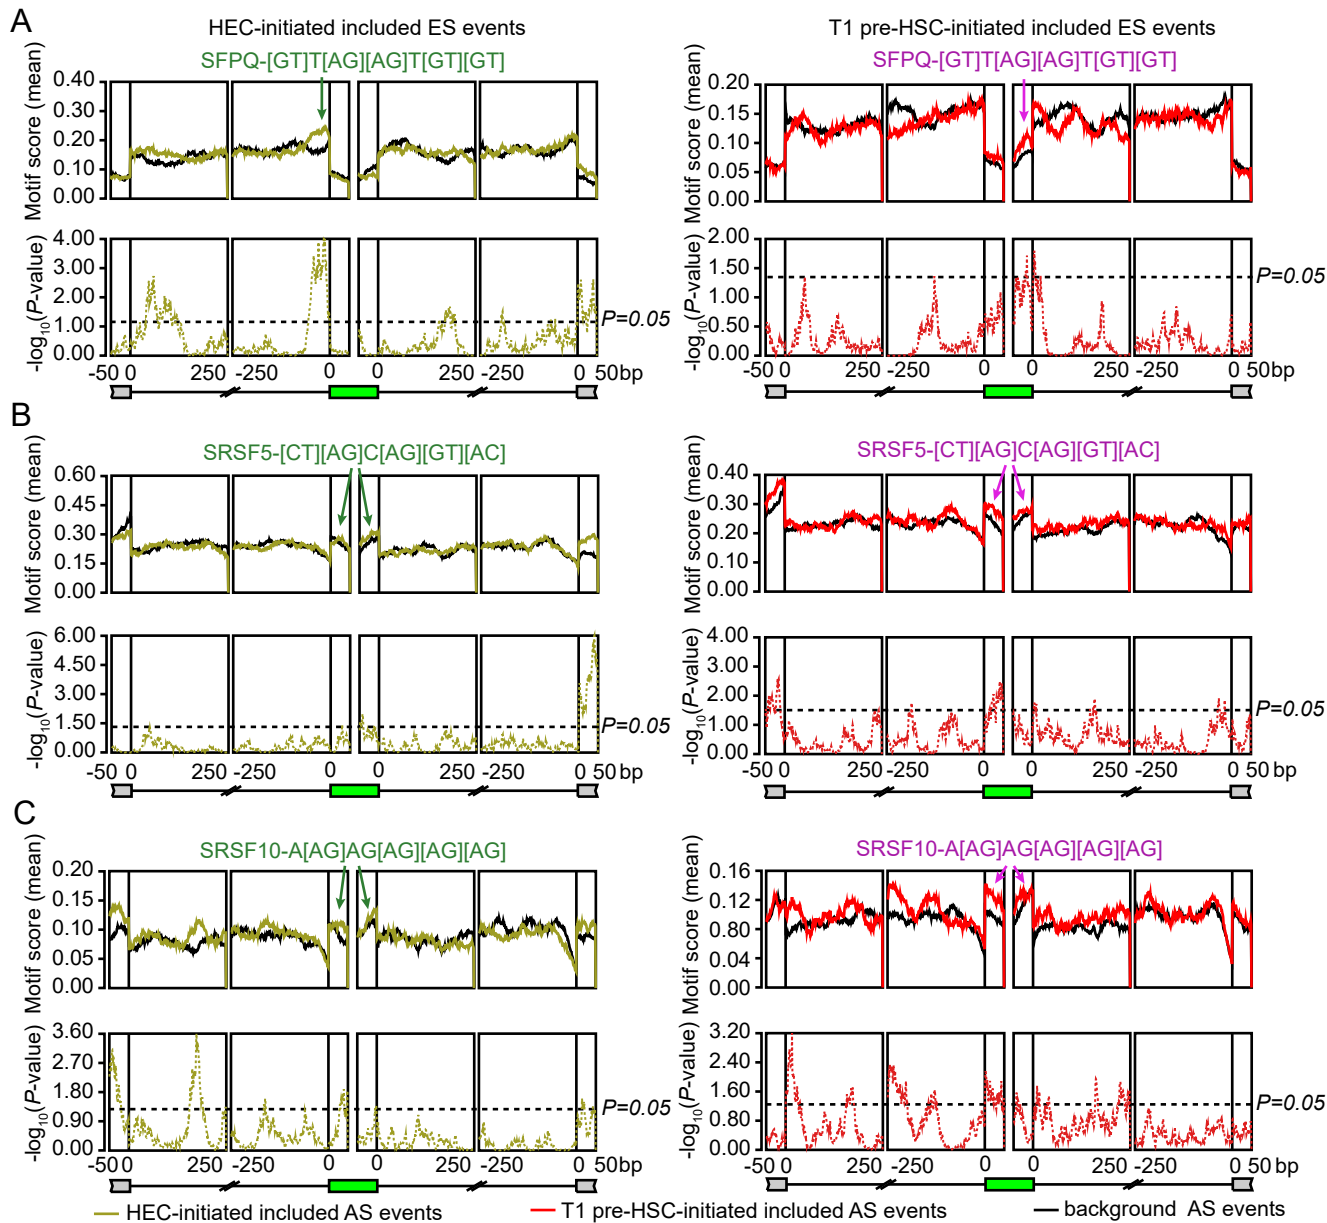

**Fig. S5. RBP regulators for EHT.**

**(A-C)** Positional distribution of indicated RBP-binding motifs of HEC- (left) and T1 pre-HSC- (right) initiated included ES events. Motif enrichment scores (upper, solid line) and *P*-values (lower, dashed line) were plotted according to AS event positions. Arrows indicate peaks of enrichment for exons. ES: exon skipping.

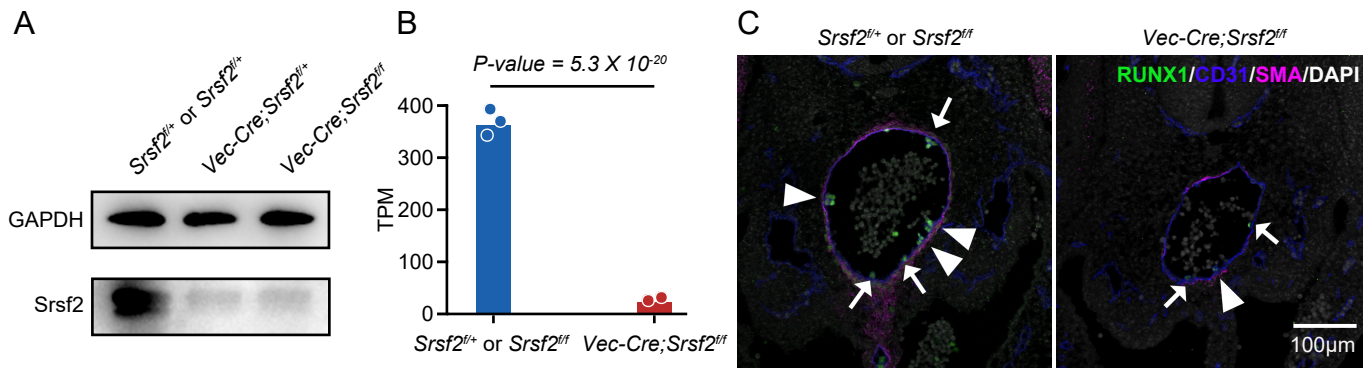

**D**

The number of small and large intra-aortic clusters in E10.0 *Srsf2*<sup>fl/+</sup> or *Srsf2*<sup>fl/fl</sup> (control) and *Vec-Cre;Srsf2*<sup>fl/fl</sup> (KO) embryos.

|                                          | No. of small clusters | No. of large clusters | No. of all clusters | No. of IHC slices |
|------------------------------------------|-----------------------|-----------------------|---------------------|-------------------|
| <i>control-1</i>                         | 59                    | 12                    | 71                  | 14                |
| <i>control-2</i>                         | 44                    | 15                    | 59                  | 13                |
| <i>control average (clusters/slices)</i> | 3.8                   | 1.0                   | 4.8                 |                   |
| <i>KO-1</i>                              | 39                    | 14                    | 53                  | 16                |
| <i>KO-2</i>                              | 39                    | 15                    | 54                  | 21                |
| <i>KO average (clusters/slices)</i>      | 2.1                   | 0.8                   | 3.9                 |                   |

**Fig. S6. Immunohistochemistry of *Srsf2* KO embryos.**

**(A)** Western blot showing the expression of *Srsf2* protein in CD44<sup>+</sup> cells from E10.0 *Srsf2*<sup>f/+</sup> or *Srsf2*<sup>f/f</sup> and *Vec-Cre;Srsf2*<sup>f/f</sup> cells. **(B)** Bar plot showing the expression of *Srsf2* in *Srsf2*<sup>f/+</sup> or *Srsf2*<sup>f/f</sup> and *Vec-Cre;Srsf2*<sup>f/f</sup> cells from RNA sequencing data. **(C)** Immunohistochemistry results of the E10.0 *Srsf2*<sup>f/+</sup> or *Srsf2*<sup>f/f</sup> and *Vec-Cre;Srsf2*<sup>f/f</sup> embryos. Arrowheads indicate the large intra-aortic clusters. Arrows indicate the small clusters. **(D)** The number of small and large intra-aortic clusters in E10.0 *Srsf2*<sup>f/+</sup> or *Srsf2*<sup>f/f</sup> (control) and *Vec-Cre;Srsf2*<sup>f/f</sup> (KO) embryos.

## Supplementary Tables:

**Table S1. Types of HEC- and T1 pre-HSC-initiated multi-isoform genes in 7 HSC development stages.**

**Table S2. HEC and T1 pre-HSC signature genes and isoforms. (A)** HEC and T1 pre-HSC signature genes. **(B)**, HEC and T1 pre-HSC signature isoforms.

**Table S3. HEC- and T1 pre-HSC-initiated included AS events and their enrichment results. (A)** HEC- and T1 pre-HSC-initiated included AS events. **(B-C)** Enrichment results of HEC- **(B)** and T1 pre-HSC-initiated **(C)** included AS events located into the CDS region.

**Table S4. Sequences for the validation of HEC- and T1 pre-HSC-initiated included AS events. (A)** Sequences used for FISH probe design. **(B)** Primers used for shRNA lentivirus construction. **(C)** Primers used for qPCR detection of selected AS events.

**Table S5. Prediction of RBPs responsible for the inclusion of hemogenic-specific included AS events. (A)** Enriched RNA binding motifs of HEC- and T1-initiated included ES events. **(B)** Relative expression level of enriched RBPs in AEC, HEC and T1 pre-HSC. **(C)** RNA binding proteins used for motif enrichment analyses.

**Table S6. Loss of *Srsf2* disrupts gene programs required for HSC formation. (A)** Differential expressed genes between *Srsf2*<sup>f/+</sup> or *Srsf2*<sup>fff</sup> (control) and *Vec-Cre;Srsf2*<sup>fff</sup> (KO) cells. **(B)** Overlap genes between HEC/T1 pre-HSC signature genes and *Srsf2* KO differently expressed genes. **(C)** Differential AS events between control and *Srsf2* KO samples.
